# Supplementary material
Source: publisher site journal article supplement (https://www.dovepress.com/article/468623)
Supplement: Supplementary file 1 [file get_supplementary_file.php]

ORIGINAL RESEARCH

Roborel de Climens et al

**Development and content validation of the Patient’s Qualitative Assessment of Treatment – Real-World (PQAT-RW): an instrument to evaluate benefits and disadvantages of treatments in real-world settings**

Aude Roborel de Climens1,*

Amy Findley2

Denise P. Bury3

Keri J. S. Brady3

Matthew Reaney4

Adam Gater2

1 Patient-Centered Solutions, IQVIA RDS France, La Défense, Cedex, France; 2 Patient-Centered Outcomes, Adelphi Values, Bollington, Cheshire, United Kingdom; 3 Patient Informed Development & Health Value Translation, Sanofi, Cambridge, Massachusetts, United States of America; 4 Patient-Centered Solutions, IQVIA, Reading, United Kingdom

***Correspondence to:** Aude Roborel de Climens, Patient-Centered Solutions, IQVIA RDS France, La Défense, Cedex, France

**Email:** [aude.roboreldeclimens@iqvia.com](mailto:aude.roboreldeclimens@iqvia.com)

# Supplementary information

## S1 Supplementary information: Development and content validation of the Patient’s Qualitative Assessment of Treatment version 2 (PQATv2)

### Methods

The original Patient’s Qualitative Assessment of Treatment (PQAT) 11 was modified to add two new items (items 2 and 4) that ask respondents to rate on a scale of 0–10 how significant were the “benefits” (item 2) or “disadvantages” (item 4) of the drug taken during the trial (see Table 1 and Fig 1). The four items (three qualitative and one quantitative) from the PQAT were retained, resulting in a six-item instrument that constitutes the second version (PQATv2). This version of the PQATv2, designed for use in clinical trials (copyright Sanofi), is available for use and can be requested from the Mapi Research Trust (<https://eprovide.mapi-trust.org/instruments/patient-s-qualitative-assessment-of-treatment-version-2>).

Members of an advisory panel of patients with type 1 diabetes mellitus (DM) (*n* = 6) and an advisory panel of patients with type 2 DM (*n* = 5) were presented with both the four-item PQAT and the six-item PQATv2, and feedback was collected on their comprehension of the items and about the relevance, clarity and ease of understanding of the two additional items included in the PQATv2. Patients recorded written comments onto the instrument copies (*n* = 10) and the interviewer collated additional notes during panel discussions.

### Results

A total of 11 patients with type 1 or type 2 DM located in Southern California (male *n* = 7, mean age 52 years) took part in the PQATv2 advisory panels (Table S1). Among those who provided written feedback, the majority (*n =* 8/10, 80% for item 2; *n =* 8/10, 80% for item 4) stated that the meaning of the two new items was clear, as was that of the response options (*n* = 10/10, 100% for item 2; *n =* 10/10, 100% for item 4).

Testing of the PQATv2 instrument therefore revealed that the two new items were well understood by patients. However, in direct response to patient feedback and to reduce ambiguity and increase clarity, minor changes were made to the wording of some of the item and response options. Specifically, some patients (*n* = 3/10, 30%) suggested that the initial term “significant” (initially used in both new items: “how significant were the benefits/disadvantages you experienced with the drug you received?”) should be reworded for clarity. Items 2 and 4 were therefore modified to remove the word “significant”, replacing it with the wording “how beneficial/disadvantageous was the drug you received during the trial?” in the validated version of the instrument. The new wording of items 2 and 4 was not tested further in the PQATv2 validation, but was tested as part of the PQAT-RW interviews.

The response options in both items 2 and 4 were also updated so that the lower end of the scale read “not [beneficial/disadvantageous] at all” and the higher end of the scale read “extremely [beneficial/disadvantageous]”. Two participants (*n* = 2/10, 20%) felt that the terms “benefits” and “disadvantages” were too vague, portentially resulting in great variability around the meaning of the terms for different patients. However, as the instrument is intended to allow for broad considerations in patient responses, the terms “benefits” and “disadvantages” were retained.

The PQATv2 has been linguistically validated in over 20 languages 28, demonstrating its applicability across varied cultural and linguistic contexts. Only minor variations were implemented across different linguistic versions of the instrument. As the word “disadvantageous” was well understood in the original US English version of the instrument, the term was maintained in other English versions (for Australia and the UK). However, adaptations of the instrument for some other English-speaking countries and some non-English languages have replaced “disadvantageous” with alternative wordings deemed more suitable to the language of the country. For example, the term “unfavorable” was used in the Spanish version of the instrument for Spain, as participants reported it to be easier to understand and more idiomatic than “disadvantageous”. The term “unpleasant” was used in English for Canada.

**S1 Table** Sample demographic characteristics of the PQATv2 patient cohort.

| **Demographic characteristic** | **Total (*N* = 11)** |
| --- | --- |
| **Gender, *n* (%)**  Female  Male | 4 (36.4)  7 (63.6) |
| **Age, years**  Mean  Minimum, maximum | 52  27, 67 |
| **Diagnosis, *n* (%)**  T1DM  T2DM | 6 (54.5)  5 (45.5) |

**Abbreviations**: T1DM, type 1 diabetes mellitus; T2DM, type 2 diabetes mellitus;PQATv2, Patient’s Qualitative Assessment of Treatment version 2.

## S2 Supplementary information Cognitive debriefing interview guide

## S3 Supplementary information Cognitive debriefing results from the introductory instructions of the PQAT-RW.

| Instruction | Understanding | Suggested changes |
| --- | --- | --- |
| The following questions ask for your opinion on [drug], the drug that you are currently taking to treat your [condition] | *N* = 16/16 (100%) participants understood this instruction without difficulty  *“… you're looking for my opinion on the medication I am on that I'm taking to treat my MS”* | *n* = 1/16 (6.3%) suggested changing ‘the drug’ to ‘the medication’  *“I would just say, uh, we would like to better understand your own experience taking the medication or using the medication … Um, I think, uh, it just sounds better”*  *n* = 15/16 (93.8%) did not suggest a change |
| There are no right or wrong answers; we would like to better understand your own experience of the drug | *N* = 16/16 (100%) participants understood this instruction without difficulty  *“… to be honest about, um, my opinion and, and how these drugs have impacted my life”* | *n* = 1/16 (6.3%) suggested changing semicolon to a full stop  *“... instead of that, um, semicolon it just should be a period”*  *n* = 15/16 (93.8%) did not suggest a change |

**Abbreviations**: PQAT*-*RW, Patient’s Qualitative Assessment of Treatment – Real-World.

## S4 Supplementary information Cognitive debriefing results of the individual items of the PQAT-RW.

| Item | Understanding | Response | Suggested changes |
| --- | --- | --- | --- |
| Item 1 (main benefits)  What are the main benefits you experience from [drug], the drug you are currently taking to treat your [condition]? | *N* = 16/16 (100%) understood the item  *“… they want to know, you know, what good do I get out of this medication”* | *N* = 16/16 (100%) thought this item was easy to answer  *“It was pretty easy. Uh, it's a general question and I didn’t have any trouble answering it”*  *n* = 13/16 (81.3%) thought it was easy to know how much detail to provide in their answer  *“Easy … I mean I think because of the size of the textbox you can't really go into too much detail. But I, I think that it's a pretty basic question where you could just write a few sentences”*  *n* = 3/16 (18.8%) it was unclear if it was easy/difficult for them to know how much detail to provide.  *“Um, well it—I guess it depends on how thorough you want the answer”* | *n* = 1/16 (6.3%) participant recommended rewording the item to say ‘primary benefit’ instead of ‘main benefits’  *“If you're interested in, in the function ability of the medicine, the, the primary benefit would be better”*  *n* = 15/16 (93.8%) participants did not recommend any changes |
| Item 2 (rate beneficial)  On a scale of 0 to 10, based on your own experience how beneficial is [drug], the drug you are currently taking to treat your [condition]  0 = Not beneficial at all  10 = Extremely beneficial | *n* = 16/16 (100%) demonstrated understanding of this item with no difficulty  *“It means that I need to rate it on a scale of one to ten how, how much it's helping me, how beneficial it is”* | *n* = 15/16 (93.8%) thought this item was easy to answer  *“Very, very easy because if it wasn’t helping me, I'd give it a one”*  *n* = 1/16 (6.3%) found it difficult to answer this item  *“… it's so difficult to pick a number that, you know because on any particular day the number would change …”* | *n* = 1/16 (6.3%) participant recommended removing the words ‘based on your own experience’ as they felt this was redundant  “*I would take out, based on your own experience. We know it's my experience. That's why we doing this, you know—that’s why I'm taking it*”  *n* = 15/16 (93.8%) suggested no changes |
| Item 2 (alternative)  On a scale of 0 to 10, based on your own experience how would you rate the overall benefits of [drug], the drug you are currently taking to treat your [condition]?  0 = No benefit at all  10 = Greatest possible benefit | *N* = 16/16 (100%) demonstrated understanding of this item with no difficulty  *“It's the same thing, to rate it based on how, how much it helps me”*  *n* = 13/16 (81.3%) felt this item was asking the same as the original item  *“The same thing as above. It's just a little more—at least for me I like the wording more”*  *n* = 3/16 (18.8%) felt that the word overall meant they considered the ‘bigger picture’  *“… when you say overall benefits, um, there again that takes into it's not just asking about the, the, uh, efficacy of the drug. It's asking about any and all benefits”* | *n* = 12/16 (75.0%) thought the response option wording ‘greatest possible benefit’ made sense  *“Yeah. I don’t have any problem with, with either of the wording between extremely beneficial and greatest possible benefit is probably more definitive. It's—yeah. I guess Number 2 is best. It is better”*  *n* = 2/16 (12.5%) didn’t like the phrase ‘greatest possible benefit’  *“So, yes. Greatest possible benefit. Um, I don’t, you know, I don’t like greatest possible benefit”*  *n* = 2/16 (12.5%) were not asked specifically about the phrase ‘Greatest possible benefit’ | *n* = 2/16 (12.5%) suggested rewording the response option ‘greatest possible benefit’  *“Greatest—just that I don’t think you picked the word greatest is the, the best choice. Like I said, because it seems like I have to compare it with other medications”*  *n* = 1/16 (6.3%) felt the item was too wordy and suggested removing ‘on a scale of zero to ten’ as they thought this was redundant  *“It has too many words in here that's not necessary…I would take out on a scale of zero to ten … You need to keep it simple”*  *n* = 13/16 (81.3%) suggested no changes |
| Item 3 (main disadvantages)  What are the main disadvantages you experience from [drug], the drug that you are currently taking to treat your [condition]? | *N* = 16/16 (100%) participants demonstrated understanding of this item  *“It's asking me what I don’t like about it”* | *N* = 16/16 (100%) stated that they thought this item was easy to answer  *“Pretty easy. Again, it might just be the simplistic nature of my situation, but for me it was really easy”*  *n* = 14/16 (87.5%) thought it was easy to know how much detail to provide in their answer  *“It was very easy 'cause I, I, I know what the disadvantages are”*  *n* = 1/16 (6.3%) felt the detail of the response would be subjective  *“Hmm, I don’t know. I think it's pretty up to you how, however detailed you want to be I guess on this”*  *n* = 1/16 (6.3%) didn’t provide an answer to this probe | *n* = 1/16 (6.3%) suggested changing disadvantages to ‘side effects’  *“I wouldn’t use that word. What are the—I would use side effects”*  *n* = 1/16 (6.3%) suggested removing ‘the drug you are currently taking’ as they thought this was redundant  *“You don’t need to say that the drug that you are currently taking on each question. If you're saying it on the first question, it's understood”*  *n* = 14/16 (87.5%) suggested no changes |
| Item 4 (rate disadvantageous)  On a scale of 0 to 10, based on your own experience how disadvantageous is [drug], the drug that you are currently taking to treat your [condition]?**  0 = Not disadvantageous at all  10 = Extremely disadvantageous | *N* = 16/16 (100%) were able to understand and accurately interpret the item  *“Um, how, how much do the cons affect you?”*  *n* = 13/16 (81.3%) felt that disadvantageous was a difficult term to understand  *“how dis, how dis—what? How disadvantage, oh, disadvantage. I can’t even say that word. I'm sorry”*  *n* = 3/16 (18.8%) did not think that disadvantageous was a difficult term to understand | *n* = 11/16 (68.8%) stated that they thought this item was easy to answer  *“Uh, it was, um, very easy to answer”*  *n* = 5/16 (31.3%) found it difficult to answer this item  *n* = 3/5 (60.0%) felt that it was harder to rate disadvantages than advantages  *“I think it was more difficult than the other questions … Difficult to put a number on it”*  *n* = 2/5 (40.0%) initially misunderstood the scale direction  *“Ten … no, no, no, no. I meant zero….I'm sorry. You know what it is? When I see ten, my mind automatically goes to, oh that's the best”* | *n* = 12/16 (75.0%) participants recommended rewording the item; all suggested changing the word ‘disadvantageous’  *“I just think you should change that disadvantageous. Just like me stumbling on it, someone else might stumble on it, especially with MS because it could be, you know, cognitive”*  *n* = 4/16 (25.0%) participants did not suggest any changes |
| Item 4 (alternative)  On a scale of 0 to 10, based on your own experience, how would you rate the overall disadvantages of [drug], the drug that you are currently taking to treat your [condition]?  0 = No disadvantage at all  10 = Greatest possible disadvantage | *N* = 16/16 (100%) demonstrated understanding of the item  *n* = 15/16 (93.8%) felt that this item was asking the same as the original wording  *“Uh, same thing. Like how would I rate the negatives of Lexapro”*  *n* = 1/16 (6.3%) felt that this wording was different to the original wording as they considered the side effects when answering this item but didn’t in the original item wording  *“I would say not disadvantageous at all. Well maybe a one … Because I'm thinking about … how this is not good for me … So there is no disadvantages”* [original]  *“How would you rate the overall disadvantages? The overall side effects … I would give it an eight”* [alternative] | *n* = 11/16 (68.8%) indicated that the term ‘greatest possible disadvantage’ made sense  *“So for the greatest possible disadvantage … would be that it's just been someone who's had a horrible experience with the medication”*  *n* = 3/16 (18.8%) felt the term ‘greatest possible disadvantage’ was difficult to understand  *“Um, I feel like greatest possible disadvantage is a little strange because greatest possible sounds way more on the positive side and then disadvantages obviously is on the negative side … that might be a little like contradictory”*  *n* = 2/16 (12.5%) participants were not asked about the term ‘greatest possible disadvantage’ | *n* = 2/16 (12.5%) suggested changing the response option ‘greatest possible disadvantage’  *“That's like kind of weird because greatest is kind of like a, like a positive word* … *it would just be like the biggest or like many negatives … maybe largest”*  *n* = 1/16 (6.3%) suggested changing ‘the’ to ‘any’ in the item so that it read ‘rate any overall disadvantage’  *“Um, I think I would insert any before overall. How would you rate any overall disadvantages?”*  *n* = 1/16 (6.3%) suggested changing ‘disadvantages’ to ‘side effects’  *“It's the wrong word. I just think it should be side effects or something like that”*  *n* = 1/16 (6.3%) suggested changing ‘overall disadvantages’ to ‘primary disadvantage’  *“Overall disadvantages. It could be the primary disadvantage. Um, but you need disadvantage”*  *n* = 11/16 (68.8%) suggested no changes |
| Item 5 (continue taking treatment)  Are you willing to continue using [drug], the drug that you are currently taking to treat your [condition]?  Yes/No  Please explain why? | All participants (*N* = 16/16, 100%) demonstrated understanding of this item  *“Um, you know, do you feel like you can keep taking it? Have you had any issues with it? Is there any reason you would want to stop taking it? Something like that”* | *N* = 16/16 (100%) participants stated they thought this item was easy to answer  *“I found it very easy to answer this question”*  *N* = 16/16 (100%) participants thought it was easy to know how much detail to provide in their answer  *“I just—it'd be basically just reiterating the yes, um, with a couple of examples of why”* | *n* = 1/16 (6.3%) suggested removing ‘the drug you are currently taking’  *“The drug that you are currently taking. You don’t need that. I told you. It's straightforward”*  *n* = 1/16 (6.3%) suggested removing ‘willing’  *“You know, it just is not something I've seen worded that way before. It's basically like, so do you want to continue with this or not”*  *n* = 14/16 (87.5%) did not suggest any changes |
| Item 6 (benefits vs. disadvantages)  Based on your own experience of [drug], the drug that you are currently taking to treat your [condition], please select a response on the scale below  −3 = The disadvantages of [drug], significantly outweigh the benefits  0 = There were equal benefits and disadvantages of [drug]  3 = The benefits of [drug] significantly outweigh the disadvantages | All participants (N = 16/16, 100%) demonstrated understanding of this item  *“It's asking me to compare the—is it—you're asking for my overall opinion do the—are there more benefits than there are negatives or disadvantages”* | *n* = 7/11 (63.6%) of the participants who debriefed the original response option layout stated that they thought this item was easy to answer  *“Yeah. They're very simple and it's giving me a range of what—where you are with this drug”*  *n* = 4/11 (36.4%) found it difficult to answer this item  *n* = 2/4 (50.0%) understood the number scale eventually but initially found it difficult to make sense of  *n* = 2/4 (50.0%) did not understand the number scale*  *“I don’t understand why the negative three, negative two, negative one. I'm not—that's—the disadvantages in this—it should be true or false, right? ... So what does minus three mean?”*  *N* = 5/5 (100%) of the participants who debriefed the updated layout stated they thought this item was easy to answer  *“Yes. It's very straightforward. Um, it's very easy to understand”* | *n* = 6/11 (54.6%) of the participants who debriefed the original response option layout suggested changing the format of the original response options (vertical) to horizontal*  *“I might list it horizontally rather than vertically. I think it'd be a little easier”*  *n* = 4/11 (36.4%) of participants who debriefed the original format did not suggest any changes to the format  *n* = 5/5 (100%) of the participants who debriefed the new layout did not suggest any changes to the format  *n* = 2/16 (12.5%) suggested changing the response option wording (both participants debriefed the original response option layout)  *n* = 1/2 (50.0%) suggested changing ‘significantly outweigh’ to ‘comparing’  *“I think comparing for me is better than significantly outweigh”*  *n* = 1/2 (50.0%) suggested changing the response option for 0 to ‘the advantages and disadvantages are equal’  *“I'm a little on the fence about zero, um, saying there were equal benefits and disadvantages 'cause it's still inferring … there are disadvantages”*  *“*INTERVIEWER*: what do you think would be a better way of wording that?”*  *“… the advantages and disadvantages are equal”*  *n* = 1/16 (6.3%) suggested adding further instruction to tell the reader to rate their experience (this participant debriefed the new layout)  *“Um, maybe at the end where it says select a response. Um, I don’t know how I would reword that, but maybe say like your rating—I don’t know. Tell me what to do with the scale below. Like I don’t know”*  *n* = 13/16 (81.3%) did not suggest any wording changes |

*For one of these participants there was a page layout/misprint error in the document which caused confusion; **Although all participants understood the original wording of item 4, 13 (81.3%) participants felt that “disadvantageous” was difficult to understand and 12 (75.0%) participants suggested changing the wording because they felt that some people may find it difficult to understand.
